# Supplementary material for: Variation in the BrHMA3 coding region controls natural variation in cadmium accumulation in Brassica rapa vegetables
Source: PubMed Central journal article supplement — J Exp Bot. 2019 Aug 1;70(20):5865–78. doi: 10.1093/jxb/erz310 (PMC6812716; doi:10.1093/jxb/erz310), 2019-08-01
Supplement: erz310_suppl_supplementary_material.pdf [file erz310_suppl_supplementary_material.pdf]

**Variation in the coding region of the heavy metal ATPase *BrHMA3* controls natural variation in cadmium accumulation in widely eaten *Brassica rapa* vegetables**

Lingxiao Zhang, Jian Wu, Zhong Tang, Xin-Yuan Huang, Xiaowu Wang, David E. Salt, Fang-Jie Zhao

**Supplementary Figures S1–S10 and Tables S1-S4**

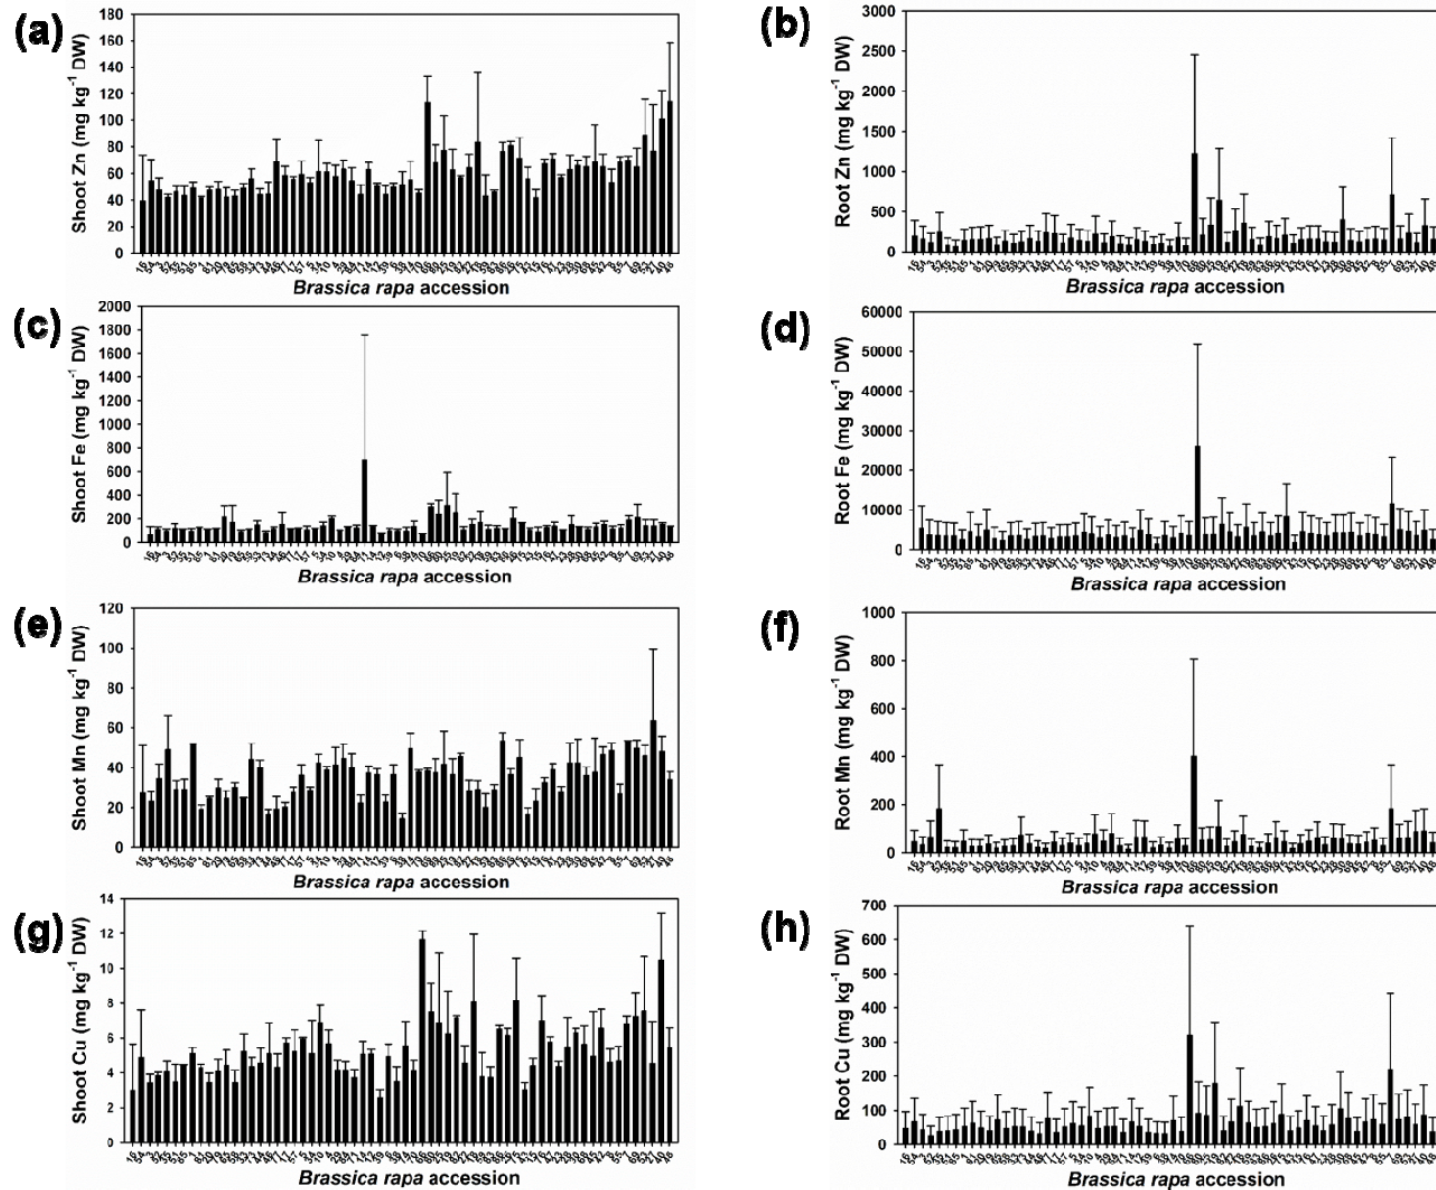

**Fig. S1.** Concentrations of Zn (a, b), Fe (c, d), Mn (e, f) and Cu (g, h) in the shoots (a, c, e, g) and roots (b, d, f, h) of 64 *Brassica rapa* accessions grown in hydroponic culture. Data are the means  $\pm$  SD ( $n = 3$ ).

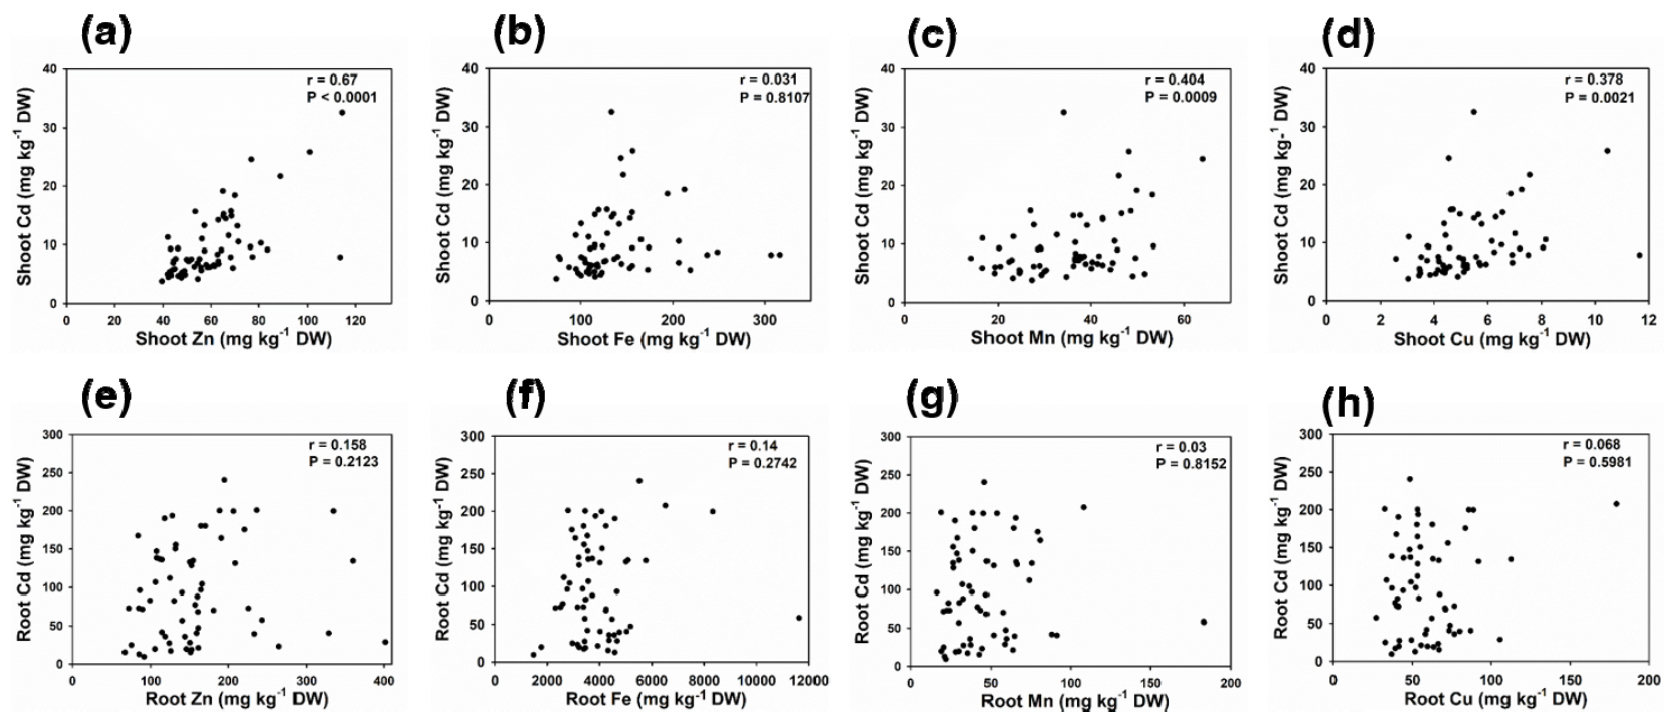

**Fig. S2.** Relationships between the concentration of Cd with those of Zn (a, e), Fe (b, f), Mn (c, g) and Cu (d, h) in the shoots (a – d) and roots (e – h) of 64 *Brassica rapa* accessions grown in hydroponic culture.

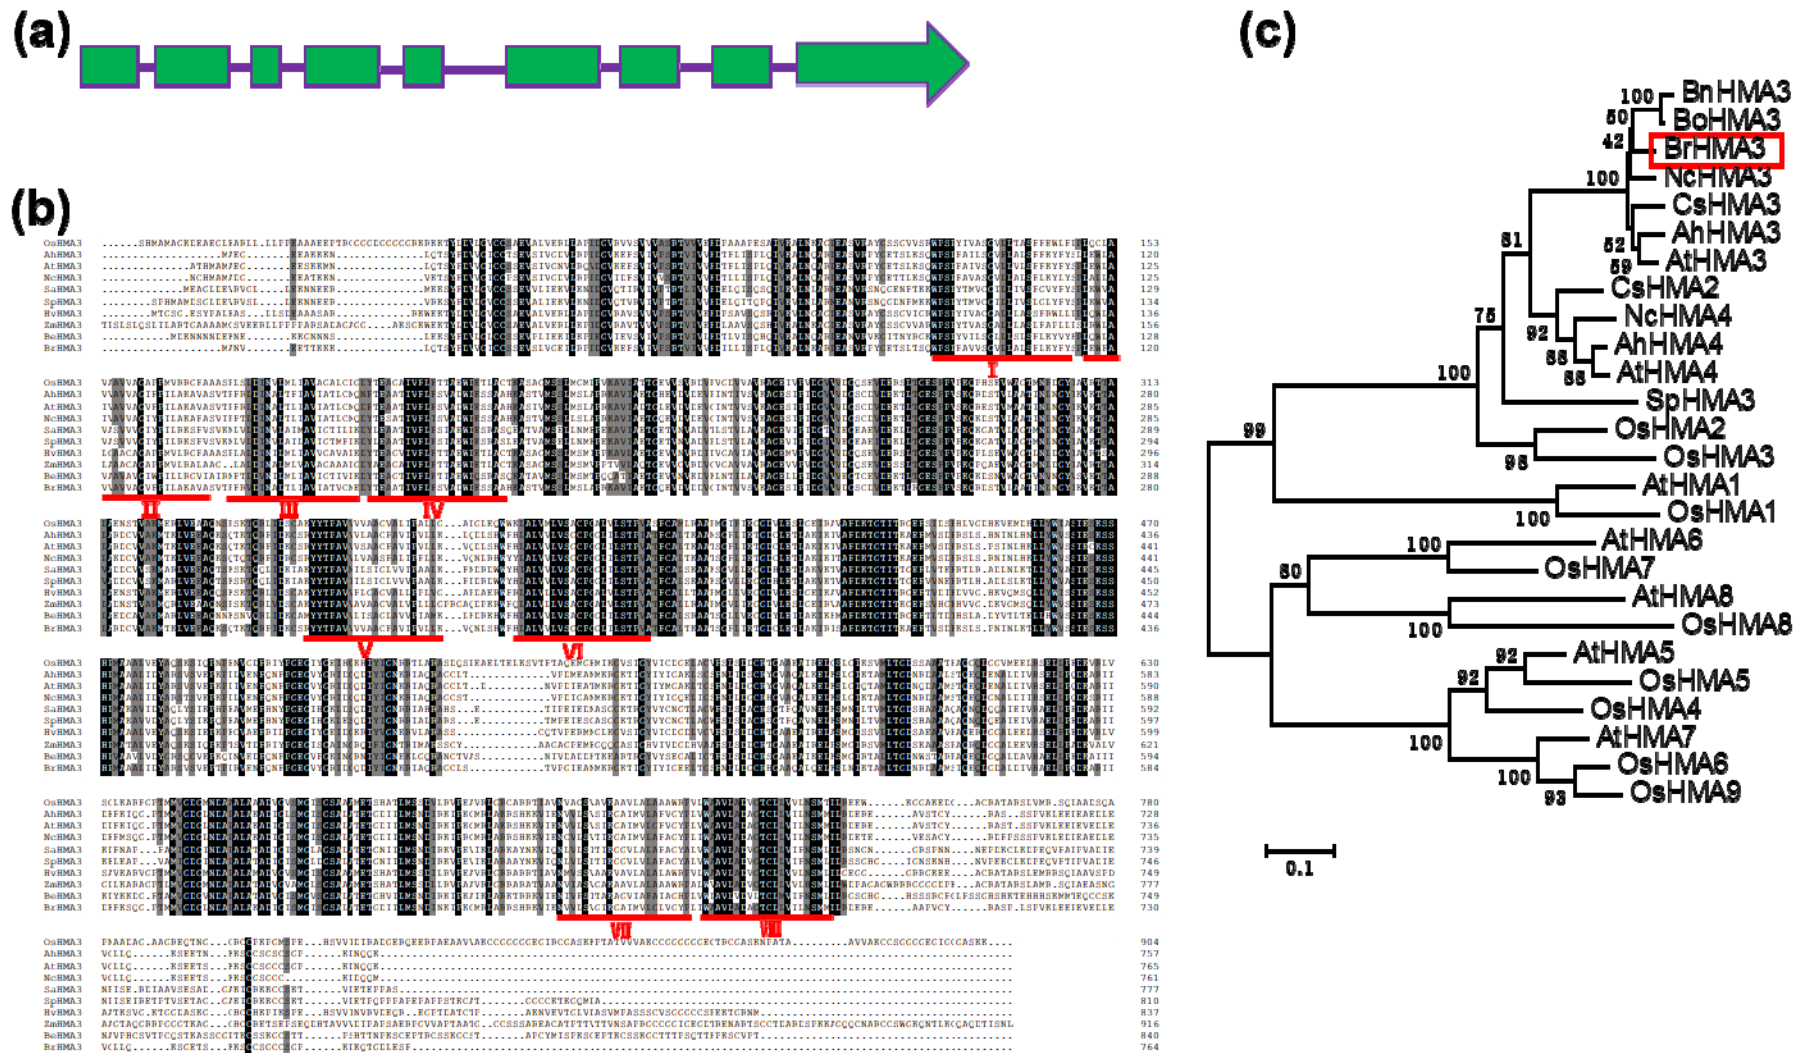

**Fig. S3.** *BrHMA3* gene in *Brassica rapa*. Schematic gene structure (a), sequence alignment of OsHMA3, AtHMA3, AhHMA3, NcHMA3, SaHMA3, SpHMA3, HvHMA3, ZmHMA3, BcHMA3, BrHMA3, (b), and phylogenetic analysis of P<sub>1B</sub>-ATPases (c). Transmembrane domains (underlined in b) were predicted by TOPCONS.

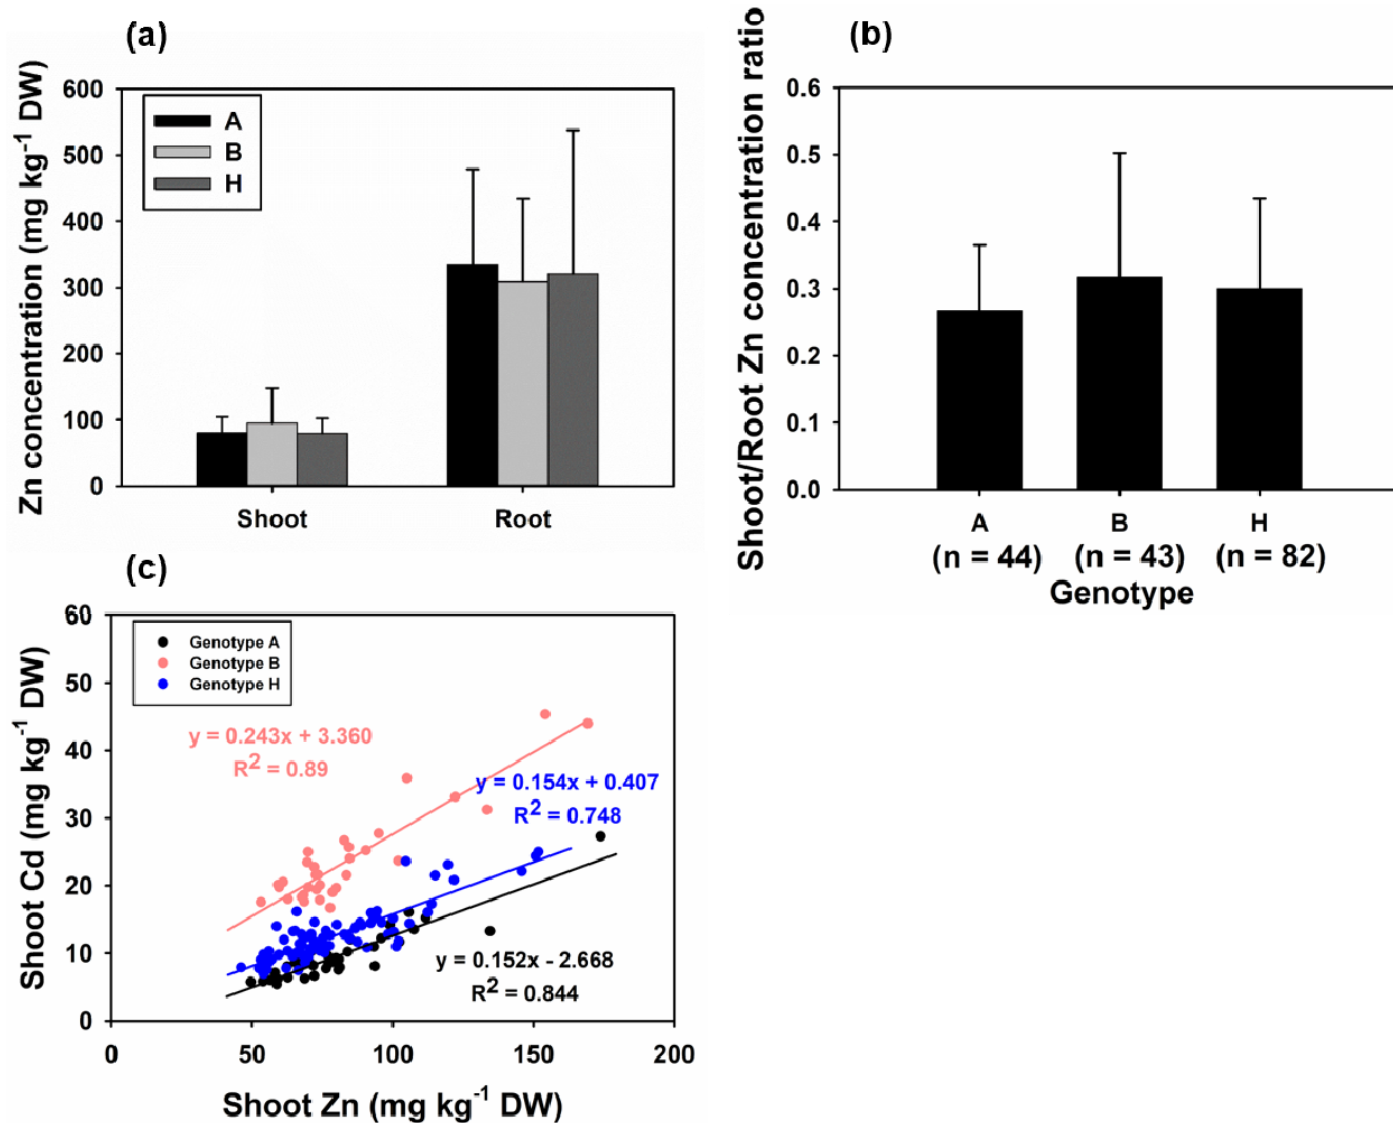

**Fig. S4.** The concentrations of Zn in the shoots and roots (a), the ratio of shoot/root Zn concentrations (b), and the relationship between the concentrations of Cd and Zn in the shoots (c) of 151 F<sub>2</sub> plants grouped according to *BrHMA3* genotypes. A, B, and H represent *BrHMA3* genotypes of GJCGB, DQMY939 and heterozygous. Data are the means  $\pm$  SD ( $n = 43 - 82$ ). DW, dry weight.

(a)

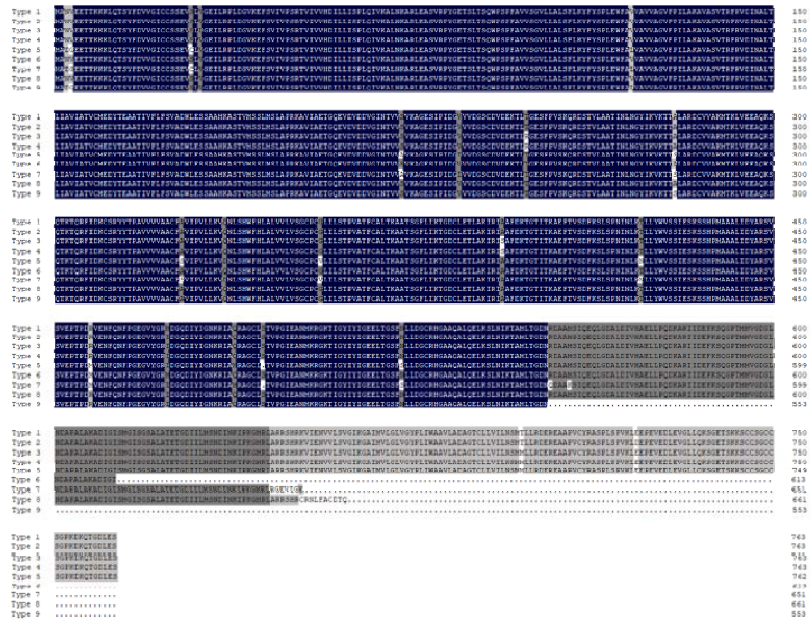

(b)

|               | Haplotypes | Frequency |
|---------------|------------|-----------|
| <b>Low-Cd</b> | Type1      | 3         |
|               | Type2      | 2         |
|               | Type3      | 8         |
|               | Type4      | 2         |
|               | Type5      | 27        |
|               | Type6      | 4         |
|               | Type7      | 1         |
|               | Type8      | 11        |
|               | Type9      | 6         |

**Fig S5.** Amino acid sequence alignment of nine protein haplotypes of BrHMA3 among the 64 *B. rapa* accessions (a) and the frequency distribution of each haplotype (b). Sequences were aligned using the DNAMAN programme.

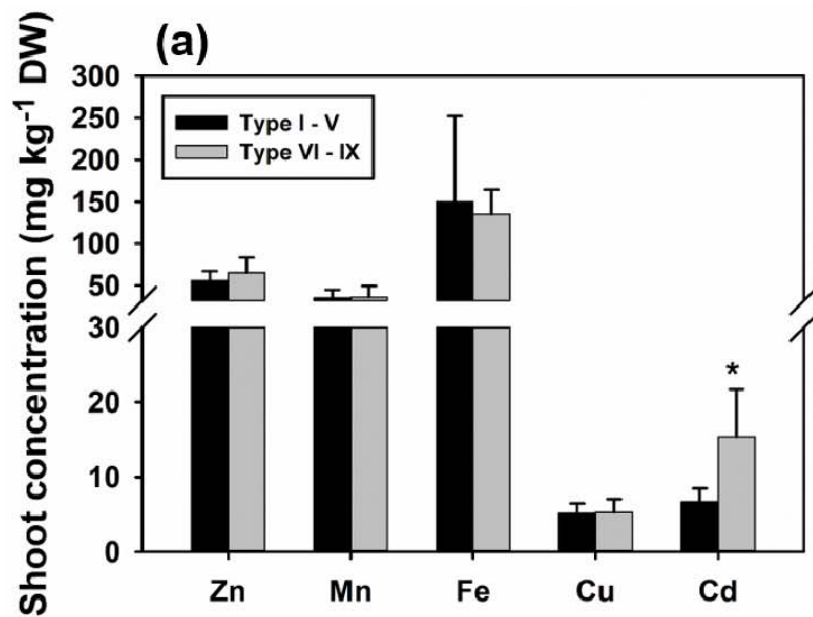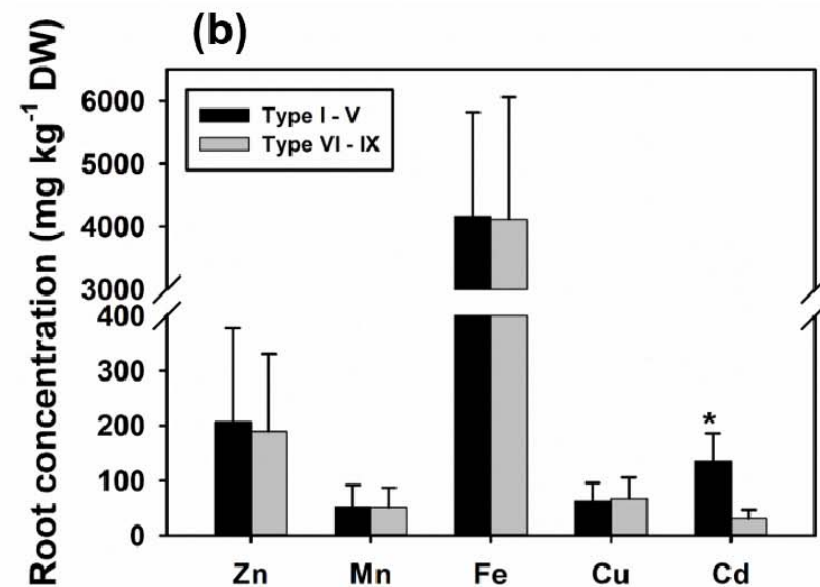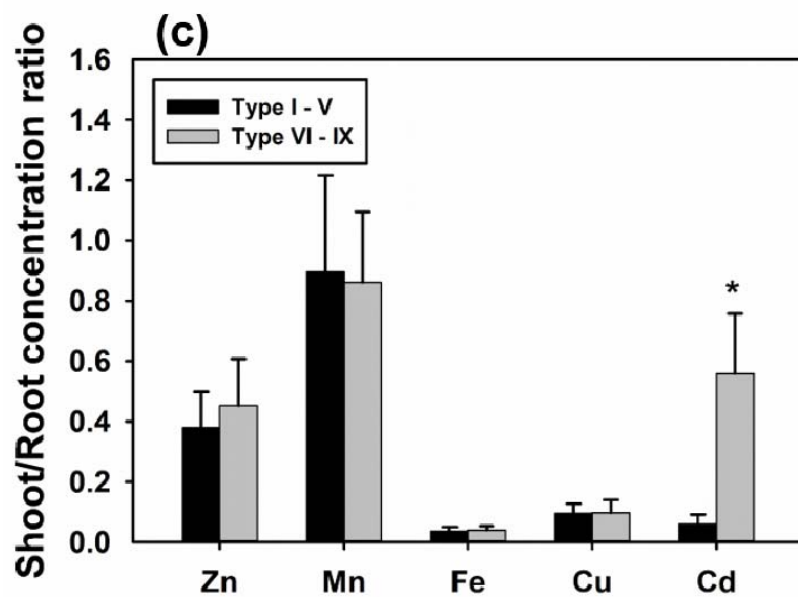

**Fig. S6.** The concentrations of Zn, Mn, Fe, Cu and Cd in the shoots (a) and roots (b), and the ratio of shoot/root metal concentrations (c) of 64 *Brassica rapa* accessions grouped according to BrHMA3 haplotypes. Data are the means  $\pm$  SD ( $n = 22 - 42$ ). \* indicates significant difference ( $P < 0.05$ , Tukey's test).

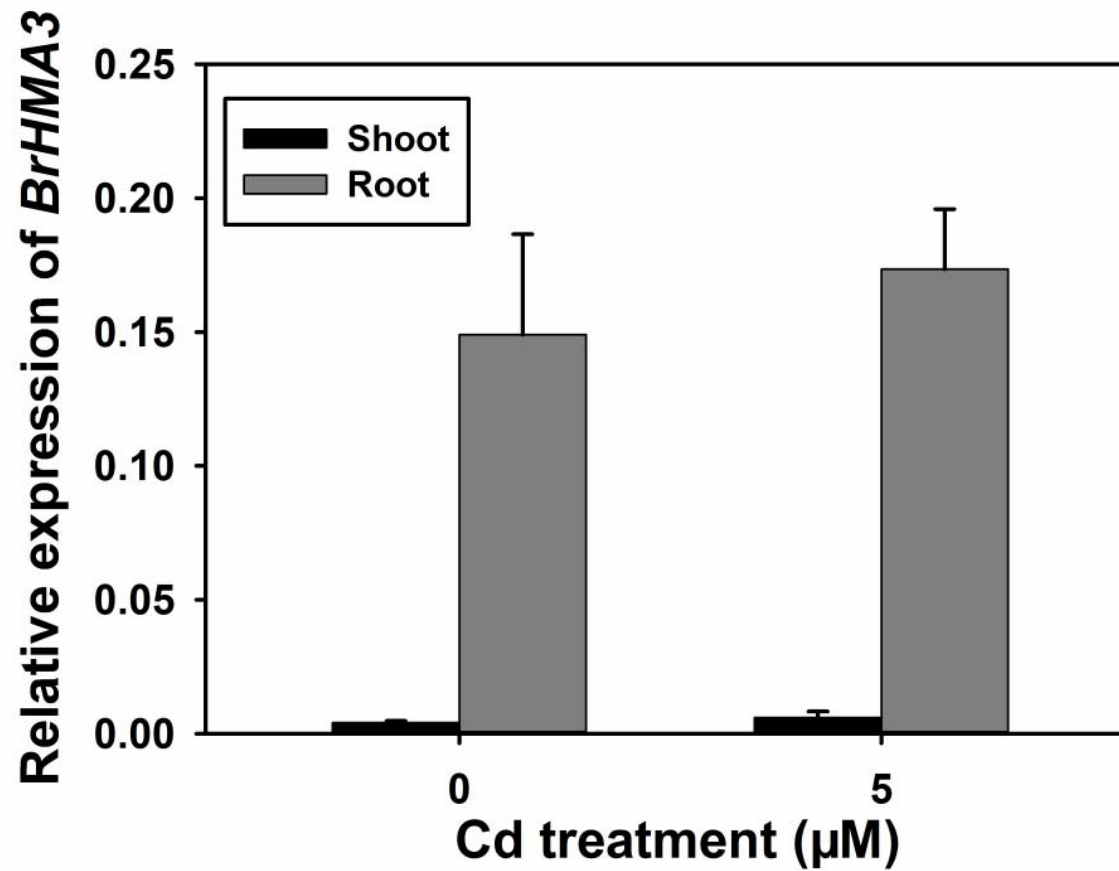

**Fig. S7.** The expression pattern of *BrHMA3* in the roots and shoots of *Brassica rapa* (cv. Chiifu) grown in hydroponic culture with or without 5 μM Cd for 3 d. Expression of *BrHMA3* was calculated as  $2^{-\Delta CT}$  relative to *Bra005178*. Data are the means  $\pm$  SD ( $n = 3$ ).



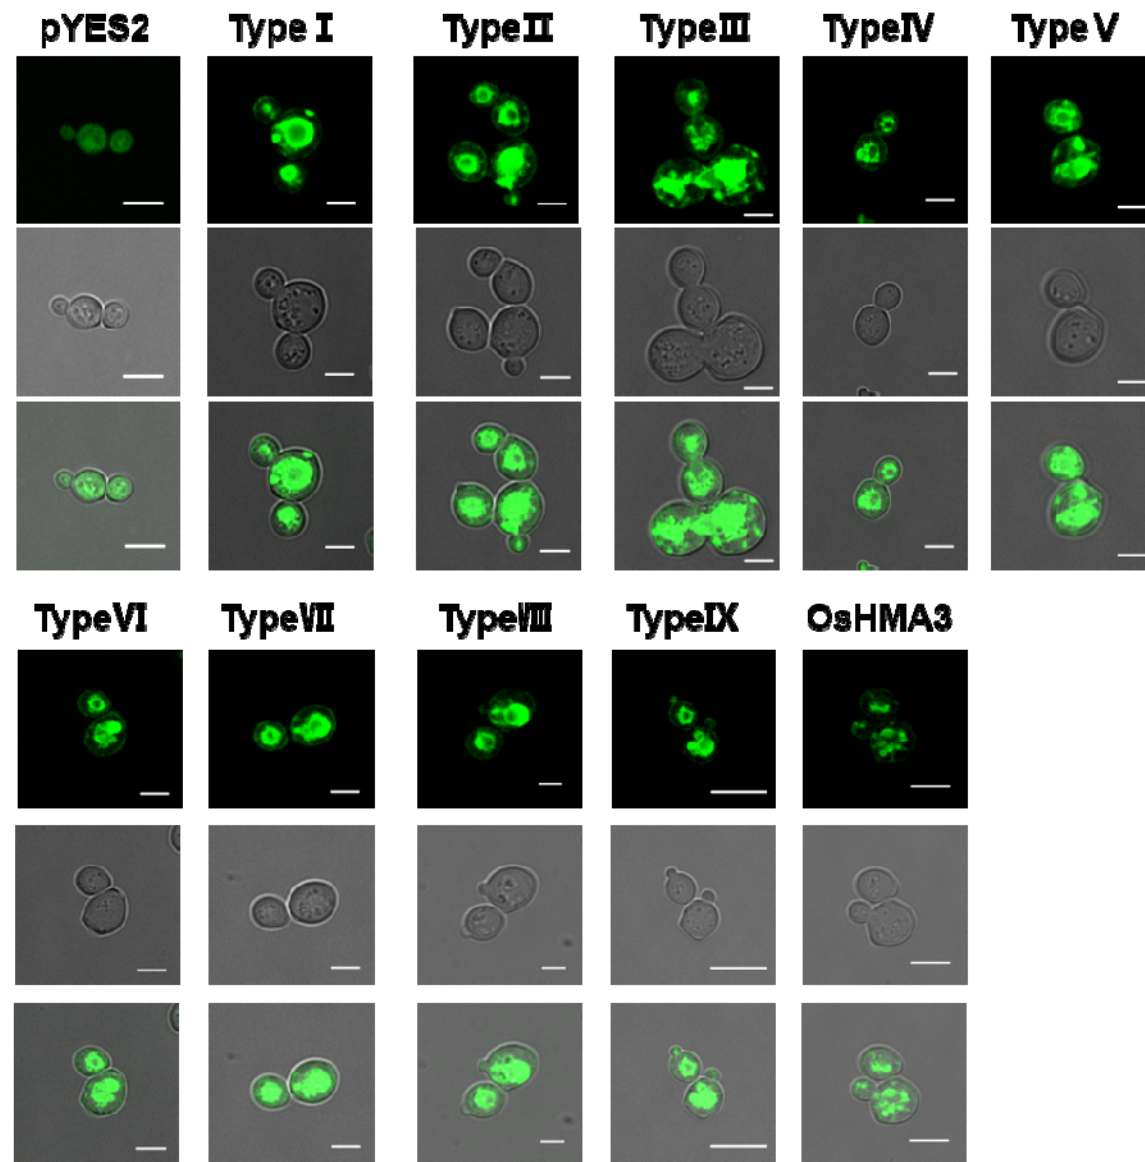

**Fig. S8.** Intracellular localization of GFP-BrHMA3 and GFP-OsHMA3 expressed in yeast strain INVSc1. Bar = 2 µm.

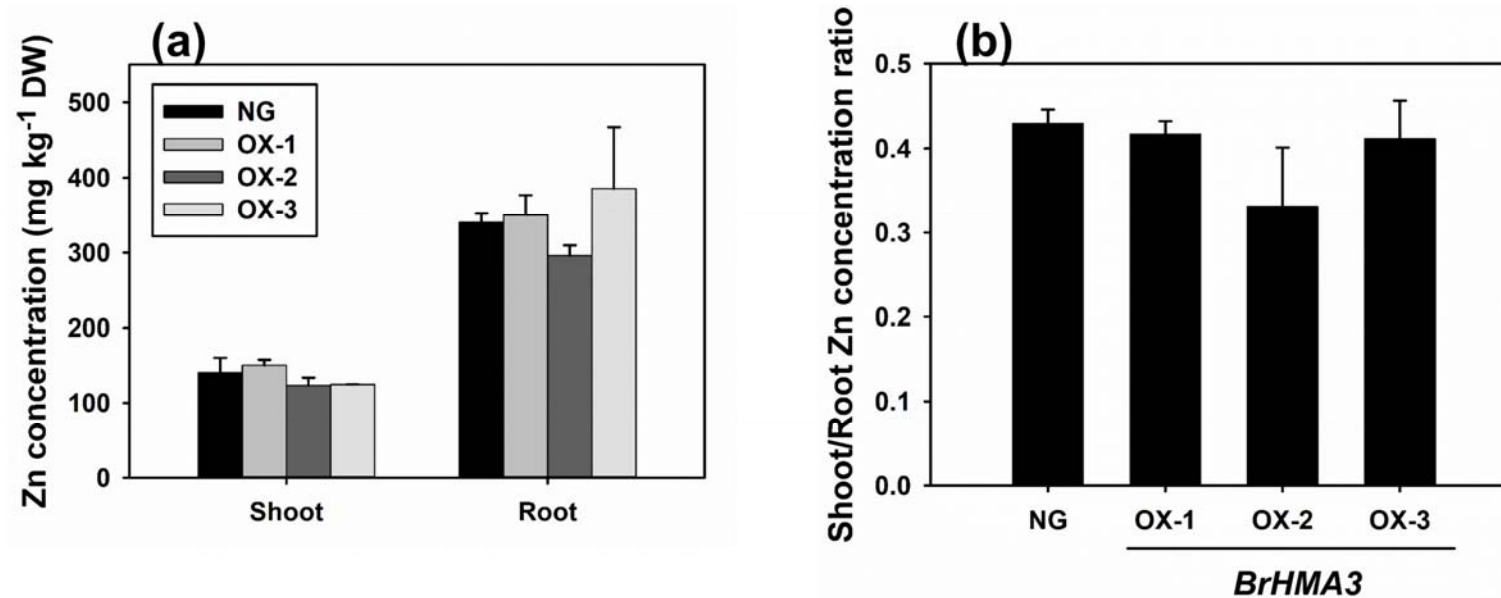

**Fig. S9.** The concentrations of Zn in the roots and shoots (a) and the shoot/root Zn concentration ratio of transgenic rice plants expressing *BrHMA3* (b). NG, non-transgenic segregation line control; OX, overexpressing lines. Data are the means  $\pm$  SD ( $n = 3$ ).

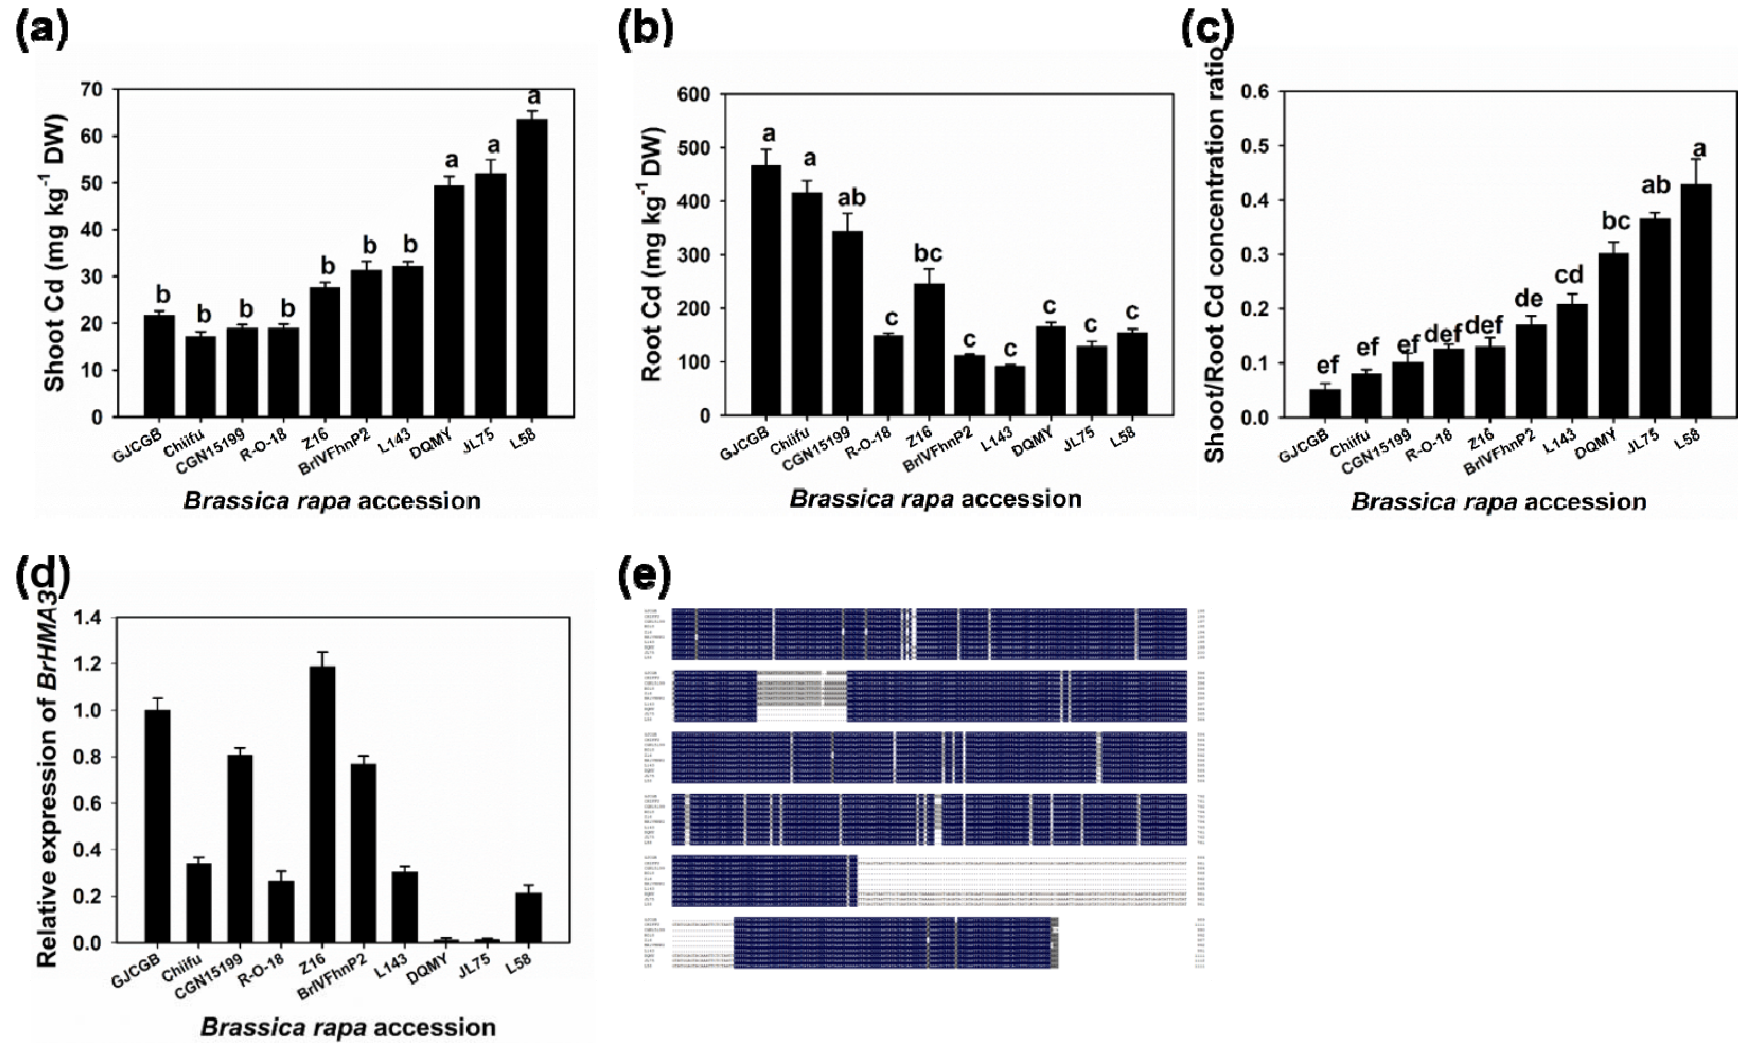

**Fig. S10.** Cadmium concentrations in the shoots (a) and roots (b), and the ratio of shoot/root Cd concentrations of ten accessions of *Brassica rapa* grown in hydroponic culture with 0.5  $\mu$ M Cd for 10 d; relative expression of *BrHMA3* in the roots (d) and the alignment of *BrHMA3* promoter sequences in the ten accession of *B. rapa* (e). Data are the means  $\pm$  SD ( $n = 3$ ). Different letters above the bars indicate significant difference at  $P < 0.05$  (Tukey's test).

**Promoter Sequence**

**Type A**

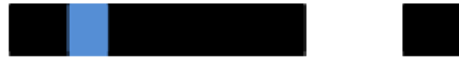

**Low Cd In shoot**

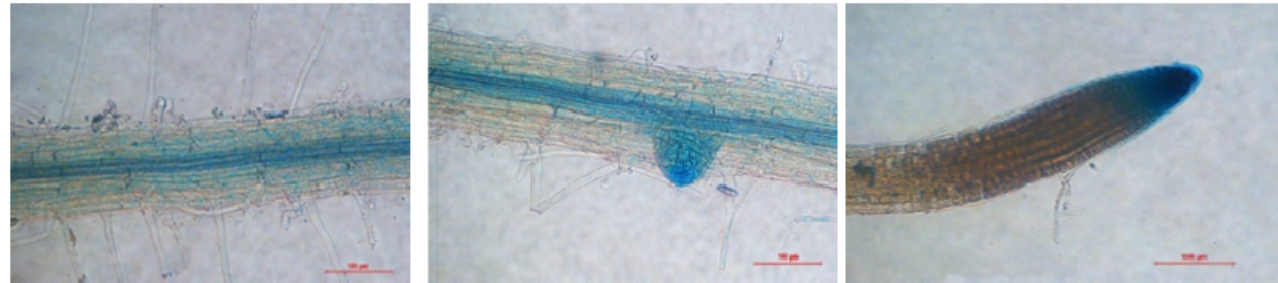

**Type B**

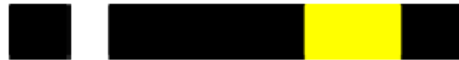

**High Cd In shoot**

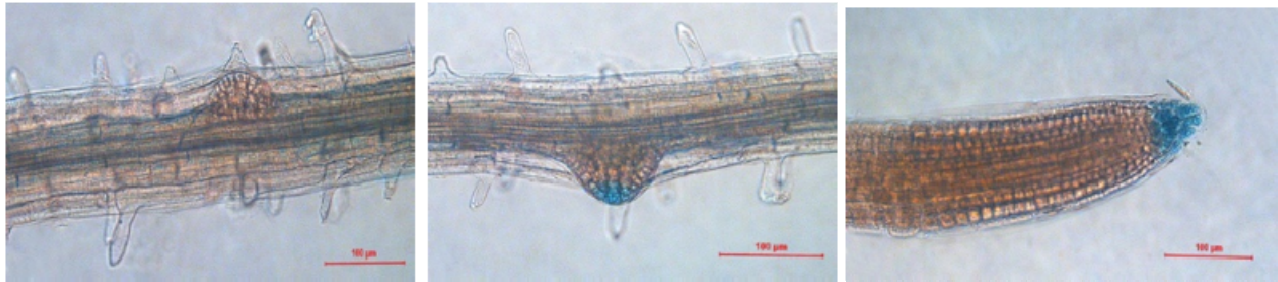

**Fig. S11.** *BrHMA3* promoter activity. GUS staining of transgenic *Arabidopsis thaliana* containing two types of  $Pro^{BrHMA3}::GUS$  constructs. The blue and yellow parts indicate 35 bp deletion and 152 bp insertion. Bar = 100  $\mu$ m.

**Table S1.** The code, name, subspecies, and BrHMA3 haplotype of 64 *Brassica rapa* accessions used in the present study

| BrHMA3 Haplotype | Subspecies                                                | Cultivar name                                       | Code |
|------------------|-----------------------------------------------------------|-----------------------------------------------------|------|
| Type I           | <i>Brassica chinensis</i> L.                              | Gaojiaochigengbai(GJCGB)                            | 3    |
| Type I           | <i>Brassica pekinensis</i>                                | DatouqingV02A155(DTQV02A155)                        | 34   |
| Type I           | <i>Brassica pekinensis</i>                                | Chiifu                                              | 52   |
| Type II          | <i>Brassica chinensis</i> L.                              | Chiqingcai(CQC)                                     | 4    |
| Type II          | <i>Brassica pekinensis</i>                                | V02A0555xiaoshizitou(V02A0555XSZT)                  | 57   |
| Type III         | <i>Brassica chinensis</i> L.                              | Sijixiangcuixiaobaicai(SJXCXBC)                     | 10   |
| Type III         | <i>Brassica chinensis</i> L.                              | Shanghaiyueman(SHSYM)                               | 14   |
| Type III         | <i>Brassica narinosa</i> L. H. Bailey                     | Zhongbayewutaicai(ZBYWTC)                           | 19   |
| Type III         | <i>Brassica pekinensis</i>                                | Shangdong4(SD4)                                     | 26   |
| Type III         | <i>Brassica pekinensis</i>                                | Fushan212(FS212)                                    | 54   |
| Type III         | <i>Brassica parachinensis</i> L. H. Bailey                | Zicaitai(ZCT)                                       | 65   |
| Type III         | <i>Brassica parachinensis</i> L. H. Bailey                | Gailiangshiyuehong(GLSYH)                           | 66   |
| Type III         | <i>Brassica parachinensis</i> L. H. Bailey                | SynBr05                                             | 86   |
| Type IV          | <i>Brassica chinensis</i> L.                              | Huaguanqinggengbaicai(HGQGBC)                       | 17   |
| Type IV          | <i>Brassica narinosa</i> L. H. Bailey                     | Lvlingwutacai(LLWTC)                                | 18   |
| Type V           | <i>Brassica chinensis</i> L.                              | V02B0645Huoququanxinwu(V02B0645HQQXH)               | 1    |
| Type V           | <i>Brassica chinensis</i> L.                              | Shianyoucai(SAYC)                                   | 5    |
| Type V           | <i>Brassica chinensis</i> L.                              | Zhongheqingcai(ZHQC)                                | 6    |
| Type V           | <i>Brassica chinensis</i> L.                              | Material from Holland by Zhaojianjun                | 12   |
| Type V           | <i>Brassica chinensis</i> L.                              | V02B0591Takucai(V02B0591TKC)                        | 16   |
| Type V           | <i>Brassica pekinensis</i>                                | Z16                                                 | 20   |
| Type V           | <i>Brassica pekinensis</i>                                | Jianchun(JC)                                        | 25   |
| Type V           | <i>Brassica pekinensis</i>                                | 424-2-3                                             | 29   |
| Type V           | <i>Brassica pekinensis</i>                                | 14Hetaowenxiaqingkou(14HTWXQK)                      | 33   |
| Type V           | <i>Brassica pekinensis</i>                                | Beijingxinsanhao(BJXSH)                             | 35   |
| Type V           | <i>Brassica pekinensis</i>                                | V02A1351Shimabaicai(V02A1351SMBC)                   | 44   |
| Type V           | <i>Brassica pekinensis</i>                                | CGN07201                                            | 46   |
| Type V           | <i>Brassica pekinensis</i>                                | Kenshin                                             | 51   |
| Type V           | <i>Brassica pekinensis</i>                                | Yunhongzhongjiang(YHZJ)                             | 58   |
| Type V           | <i>Brassica campestris</i> L.                             | Liuye70tianyouqingcaixin(LY70TYQCX)                 | 70   |
| Type V           | uncultivated                                              | Chamagudaoyebaicai(CMGDYBC)                         | 71   |
| Type V           | Yellow Sarson                                             | R-o-18                                              | 73   |
| Type V           | Yellow Sarson                                             | L143                                                | 74   |
| Type V           | Komatsuna                                                 | L41                                                 | 75   |
| Type V           | Komatsuna                                                 | CGN17281                                            | 76   |
| Type V           | <i>Brassica juncea</i> var. <i>multisecta</i> L.H. Bailey | Xizhangyeshengbaicai8#(XZYSBC8#)                    | 77   |
| Type V           | <i>Brassica rapa</i> L.                                   | CGN15199                                            | 79   |
| Type V           | <i>Brassica rapa</i> L.                                   | CGN15220                                            | 80   |
| Type V           | <i>Brassica rapa</i> L.                                   | CGN15201                                            | 81   |
| Type V           | <i>Brassica rapa</i> L.                                   | CGN06721                                            | 82   |
| Type V           | <i>Brassica pekinensis</i>                                | Sijichun (SJC)                                      | 84   |
| Type V           | Rapid cycling                                             | SynBr02                                             | 85   |
| Type VI          | <i>Brassica chinensis</i> L.                              | Shanghaiqing(SHQ)                                   | 7    |
| Type VI          | <i>Brassica chinensis</i> L.                              | Suzhouqing(SZQ)                                     | 8    |
| Type VI          | <i>Brassica pekinensis</i>                                | Xianfengxiayang(XFXY)                               | 22   |
| Type VI          | <i>Brassica pekinensis</i>                                | Beijing75(BJ75)                                     | 30   |
| Type VII         | <i>Brassica campestris</i> L.                             | L58DH                                               | 68   |
| Type VIII        | <i>Brassica chinensis</i> L.                              | Jingyanwuyueman(JYWYM)                              | 15   |
| Type VIII        | <i>Brassica pekinensis</i>                                | BrIVFhn P1                                          | 23   |
| Type VIII        | <i>Brassica pekinensis</i>                                | Xinfeng90(XF90)                                     | 38   |
| Type VIII        | <i>Brassica pekinensis</i>                                | 33--3                                               | 40   |
| Type VIII        | <i>Brassica pekinensis</i>                                | Huabai2(HB2)                                        | 42   |
| Type VIII        | <i>Brassica pekinensis</i>                                | V02A1499Zhulongcai(V02A1499ZLC)                     | 43   |
| Type VIII        | <i>Brassica pekinensis</i>                                | Xinlv85(XL85)                                       | 47   |
| Type VIII        | <i>Brassica pekinensis</i>                                | Xiakang40(XK40)                                     | 48   |
| Type VIII        | <i>Brassica pekinensis</i>                                | Zhulongcai(ZLC)                                     | 53   |
| Type VIII        | <i>Brassica pekinensis</i>                                | Qingbai'er5-4-2(QBE5-4-2)                           | 55   |
| Type VIII        | <i>Brassica campestris</i> L.                             | Dongguanbaishayouqing45tiantiancaixin(DGBSYQ45TTCX) | 69   |
| Type IX          | <i>Brassica pekinensis</i>                                | Ji'nandagenV02A0806(JNDGV02A0806)                   | 27   |
| Type IX          | <i>Brassica pekinensis</i>                                | Jinlv75(JL75)                                       | 28   |
| Type IX          | <i>Brassica pekinensis</i>                                | L488-3                                              | 39   |
| Type IX          | <i>Brassica pekinensis</i>                                | V02A1396Xingchengxiaocuai(V02A1396XCXC)             | 45   |
| Type IX          | <i>Brassica pekinensis</i>                                | Daqingmaye939(DQMY939)                              | 59   |
| Type IX          | <i>Brassica rapa</i> L.                                   | CGN06688                                            | 83   |

**Table S2.** Nine *Brassica rapa* accessions selected for the soil pot experiment.

| <b>BrHMA3 Haplotype</b> | <b>Subspecies</b>             | <b>Name</b>                        | <b>Code</b> |
|-------------------------|-------------------------------|------------------------------------|-------------|
| Type I                  | <i>Brassica pekinensis</i>    | Chiifu                             | 52          |
| Type II                 | <i>Brassica pekinensis</i>    | V02A0555xiaoshizitou(V02A0555XSZT) | 57          |
| Type III                | <i>Brassica pekinensis</i>    | Shangdong4(SD4)                    | 26          |
| Type IV                 | <i>Brassica chinensis</i> L.  | Huaguanqinggengbaicai(HGQGBC)      | 17          |
| Type V                  | <i>Brassica pekinensis</i>    | Z16                                | 20          |
| Type VI                 | <i>Brassica chinensis</i> L.  | Shanghaiqing(SHQ)                  | 7           |
| Type VII                | <i>Brassica campestris</i> L. | L58DH                              | 68          |
| Type VIII               | <i>Brassica pekinensis</i>    | BrIVFhn P1                         | 23          |
| Type IX                 | <i>Brassica pekinensis</i>    | Daqingmaye939(DQMY939)             | 59          |

**Table S3.** Primers used in the present study

| <b>Purpose</b>                   | <b>Forward(5' - 3')</b>                         | <b>Reverse (5' - 3')</b>                           |
|----------------------------------|-------------------------------------------------|----------------------------------------------------|
| <b>BrHMA3 ORF (Genomic DNA)</b>  | TCCGAACACCTTTCGCGTAT                            | GTACTTACCAATTCATACAGATTC                           |
| <b>PYES2-BrHMA3</b>              | AGGGAATATTAAGCTTGGTACCATGGCCAACGTTGAAGAGACAAC   | GGCGGCCGTTACTAGTGGATCCTCAGAAACTCTCTAAGTCCCCTGTTT   |
| <b>BrHMA3-GFP</b>                | CTTCGAATTCTGCAGTCGACGGTACCATGGCCAACGTTGAAGAGACA | CTCGCCCTTGCTCACCATCAGGATCCAGAAACTCTCTAAGTCCCCTGTTT |
| <b>Genetic marker (Promoter)</b> | ATAACCTAATAATACCACGAC                           | CGTTGGATACGCGAAAGGTGTT                             |
| <b>Genetic marker (ORF)</b>      | GCAATGCTCACAGGAGATAGC                           | GCTGTAAAAATGATAACGTTTTGGTTATT                      |
| <b>Pro<sup>BrHMA3</sup>-GUS</b>  | TTAATTAATGGCCAACGTTGAAGAGACAAC                  | GGCGGCCTCAGAAACTCTCTAAGTCCCCTGTTT                  |
| <b>Arabidopsis Actin</b>         | TCGTTGCCCTCCAGAGA                               | GGTACTGAGGGAGGCCAAGAT                              |
| <b>AtHMA3 promoter</b>           | TAAAACGACGGCCAGTGCCAAGCTTACGCTTGAAACAGTTGAGAAAA | GTTGTCTCTCAACGTTGGCCATTTGAGATCTCGGACTAAATTCG       |
| <b>Rice actin</b>                | GGTCAACTTGTTGATTCCCCTCT                         | AACCGCAAAATCCAAAGAACG                              |
| <b>OsHMA3 qRT-PCR</b>            | TCCATCCAACCAAACCCGAAAA                          | TGCCAATGTCCTTCTGTTCCTCA                            |
| <b>Brassica rapa Actin</b>       | CTCACCGAAGCACCTCTCAA                            | GACCACTGGCGTAAAGGGAG                               |
| <b>BrHMA3 qRT-PCR</b>            | TTCTTGCAGATGCAGGGACTT                           | AGTCCCCTGTTGCTTGTC                                 |

**Table S4.** Ten *Brassica rapa* accessions selected for promoter analysis

| <b>BrHMA3 Haplotype</b> | <b>Subspecies</b>             | <b>Name</b>              |
|-------------------------|-------------------------------|--------------------------|
| Type I                  | <i>Brassica chinensis</i> L.  | Gaojiaochigengbai(GJCGB) |
| Type V                  | <i>Brassica pekinensis</i>    | Z16                      |
| Type V                  | Yellow Sarson                 | R-o-18                   |
| Type I                  | <i>Brassica pekinensis</i>    | Chiifu                   |
| Type V                  | Yellow Sarson                 | L143                     |
| Type IX                 | <i>Brassica pekinensis</i>    | Jinlv75(JL75)            |
| Type VII                | <i>Brassica campestris</i> L. | L58DH                    |
| Type IX                 | <i>Brassica pekinensis</i>    | Daqingmaye939(DQMY939)   |
| Type V                  | <i>Brassica rapa</i> L.       | CGN15199                 |
| Type I                  | <i>Brassica pekinensis</i>    | BrIVFhn P1               |
